# Supplementary material
Source: MDPI journal article supplement (https://www.mdpi.com/2073-4433/13/2/203)
Supplement: s1 [file s1]

# Supplementary Materials: Multiple Regression Analysis of Low Visibility Focusing on Severe Haze-Fog Pollution in Various Regions of China

Zhaodong Liu <sup>1,2</sup>, Hong Wang <sup>1,2,\*</sup>, Yue Peng <sup>1,2</sup>, Wenjie Zhang <sup>2</sup> and Mengchu Zhao <sup>3</sup>

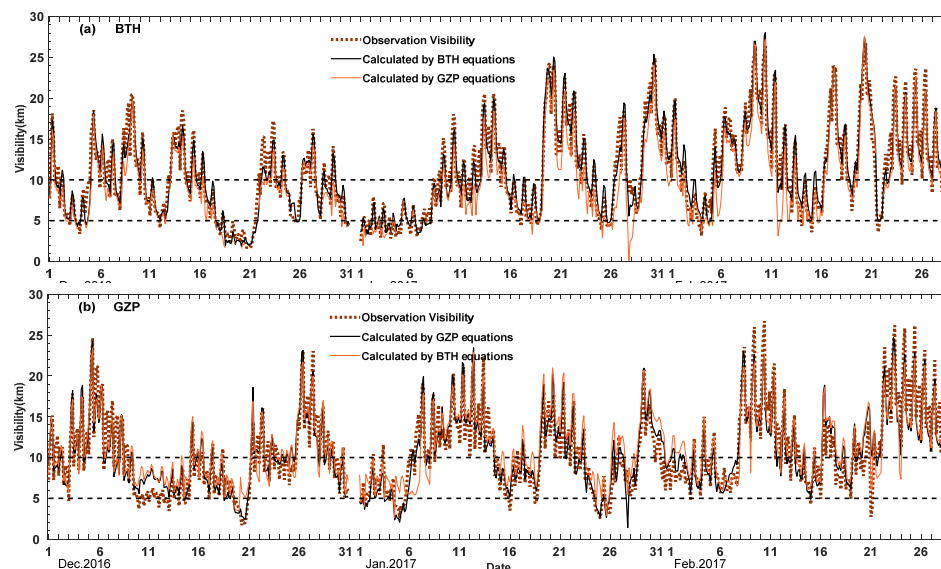

**Figure S1.** Time series of 3-hourly observations (dashed lines, km) and calculated visibility (solid lines, km) of (a) BTH, and (b) GZP calculated by different fitting equations.

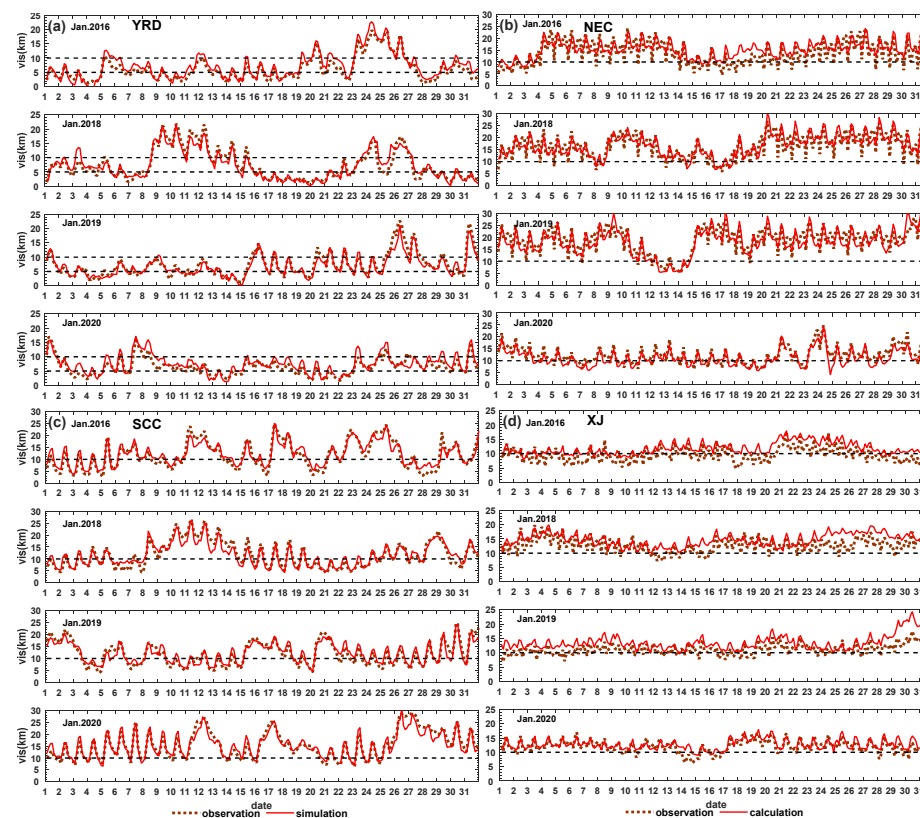

**Figure S2.** Time series of 3-hourly observed and calculated visibility (km) in (a) YRD, (b) NEC, (c) SCC and (d) XJ in January, 2016–2020 (except 2017).

**Table S1.** Evaluation for calculated visibility under observed visibility <5 km.

| Region | Year | Mean<br>OBS(km) | Mean<br>CAL(km) | MAE<br>(km) | MB<br>(km) | NMB   | RMSE<br>(km) |
|--------|------|-----------------|-----------------|-------------|------------|-------|--------------|
| YRD    | 2016 | 2.82            | 3.10            | 0.84        | 0.28       | 0.10  | 1.03         |
|        | 2018 | 3.15            | 2.84            | 0.77        | -0.31      | -0.10 | 0.95         |
|        | 2019 | 3.92            | 3.65            | 0.72        | -0.27      | -0.07 | 0.88         |
|        | 2020 | 3.32            | 3.45            | 0.81        | 0.13       | 0.04  | 0.97         |
| NEC    | 2016 |                 |                 |             | \          |       |              |
|        | 2018 |                 |                 |             |            |       |              |
|        | 2019 | 5.17            | 3.97            | 0.77        | 0.77       | 0.21  | 0.94         |
|        | 2020 | 4.91            | 4.77            | 0.64        | 0.14       | -0.03 | 0.83         |
| SCC    | 2016 | 3.63            | 4.41            | 0.62        | -0.15      | 0.04  | 0.77         |
|        | 2018 | 3.85            | 3.74            | 0.52        | -0.11      | -0.03 | 0.63         |
|        | 2019 |                 |                 |             | \          |       |              |
|        | 2020 |                 |                 |             |            |       |              |
